# Supplementary material for: Late posterior hip instability after lumbar spinopelvic fusion
Source: PubMed Central journal article supplement — Arthroplast Today. 2015 Jun 19;1(2):25–9. doi: 10.1016/j.artd.2015.05.002 (PMC4926821; doi:10.1016/j.artd.2015.05.002), 2015-06-19
Supplement: mmc1.pdf [file mmc1.pdf]

# CONFLICT OF INTEREST STATEMENT

## *Arthroplasty Today*

(Adopted from the American Academy of Orthopaedic Surgeons disclosure statement)

The following form **must be filled out completely and submitted by each author (example, 6 authors, 6 forms). If no discloser is required, please write/type "none" at the end of each sentence.**

Manuscript Title: "Late posterior hip instability after lumbar spinopelvic fusion: A Case Report"

1. Royalties from a company or supplier (The following conflicts were disclosed) *None*
2. Speakers bureau/paid presentations for a company or supplier (The following conflicts were disclosed) *None*
- 3A. Paid employee for a company or supplier (The following conflicts were disclosed) *None*
- 3B. Paid consultant for a company or supplier (The following conflicts were disclosed)  
OrthoMedFlex LLC: Paid consultant
- 3C. Unpaid consultants for a company or supplier (The following conflicts were disclosed) *None*
4. Stock or stock options in a company or supplier (The following conflicts were disclosed)  
Gilead: Stock or stock Options
5. Research support from a company or supplier as a Principal Investigator (The following conflicts were disclosed) *None*
6. Other financial or material support from a company or supplier (The following conflicts were disclosed) *None*
7. Royalties, financial or material support from publishers (The following conflicts were disclosed) *None*
8. Medical/Orthopaedic publications editorial/governing board (The following conflicts were disclosed)  
~~American Association of Hip and Knee Surgeons: Board or committee member~~ *JSM 3/9*
9. Board member/committee appointments for a society (The following conflicts were disclosed)  
*American Association of Hip and Knee Surgeons: Board or committee member*

**Each author must sign AND print or type his/her name, date and submit a separate form**

In addition, one BLINDED Conflict of Interest form (no author names used) should be submitted per manuscript with all author disclosures.

J. Stuart Melvin, MD

Author Name (Print or Type)

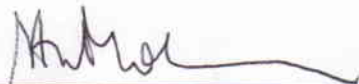

Author Signature

*3-9-15*

Date
